# Supplementary material for: Predicting decompression surgery by applying multimodal deep learning to patients’ structured and unstructured health data
Source: BMC Med Inform Decis Mak. 2023 Jan 6;23:2. doi: 10.1186/s12911-022-02096-x (PMC9824905; doi:10.1186/s12911-022-02096-x)
Supplement: Supplementary file 4 — Additional file 4: Table S4. Top 10 and Bottom 10 Predictors for Late Surgery Benchmark Model for Classical Performance [file 12911_2022_2096_MOESM4_ESM.xlsx]

## Sheet: Sheet1
Feature	Feature Type	Coefficient	Feature	Feature Type	Coefficient
sever	textual	0.738697	small left	textual	-0.266424
White	static	0.511636	possibl	textual	-0.272366
anterolisthesi l4	textual	0.492358	facet arthropathi	textual	-0.31016
mild right neural	textual	0.483452	lumbar vertebr	textual	-0.312662
sever central	textual	0.443842	asymmetr	textual	-0.402834
descend	textual	0.417951	dx_72100	temporal	-0.404622
dx_99441	temporal	0.412257	throughout lumbar	textual	-0.426332
canal mild	textual	0.393599	find	textual	-0.440657
mild spinal	textual	0.362289	tear	textual	-0.641861
posterior disc	textual	0.329438	impress mild	textual	-0.825837
